# Supplementary material for: Robust production of uniform human cerebral organoids from pluripotent stem cells
Source: Life Sci Alliance. 2020 Apr 17;3(5):e202000707. doi: 10.26508/lsa.202000707 (PMC7167289; doi:10.26508/lsa.202000707)
Supplement: Supplementary file 2 [file LSA-2020-00707_TableS2.xls]

## Sheet: Sheet1
Supplementary Table 2: Antibody List
Target	Dilution	Host Species	Manufacturer	Product #
TUJ1	1:500	Mouse	Biolegend	801202
GFAP	1:400	Rabbit	DAKO	Z0334
SOX2	1:200	Goat	Santa Cruise	SC-17320
NEUN	1:200	Rabbit	Cell Sign. Tech.	12943S
CTIP2	1:200	Rat	Abcam	ab18465
SATB2	1:200	Mouse	Abcam	ab51502
Dylight 2° 488	1:500	Donkey a mouse	Invitrogen	SA5-10166
Dylight 2° 488	1:500	Donkey a goat	Invitrogen	SA5-10086
Dylight 2° 488	1:500	Donkey a rat	Invitrogen	SA5-10026
Dylight 2° 594	1:500	Donkey a mouse	Invitrogen	SA5-10168
Dylight 2° 594	1:500	Donkey a goat	Invitrogen	SA5-10088
Dylight 2° 594	1:500	Donkey a rabbit	Invitrogen	SA5-10040
Dylight 2° 650	1:500	Donkey a mouse	Invitrogen	SA5-10169
Dylight 2° 650	1:500	Donkey a goat	Invitrogen	SA5-10089
Dylight 2° 650	1:500	Donkey a rabbit	Invitrogen	SA5-10041
Dylight 2° 650	1:500	Donkey a rat	Invitrogen	SA5-10029
